# Supplementary material for: Synthesis and characterisation of nickel oxide nanofibre webs with alcohol sensing characteristics
Source: Royal Society of Chemistry journal article supplement (doi:10.1039/c4ra11083h), 2014-01-01
Supplement: c4ra11083h1.pdf [file c4ra11083h1.pdf]

## Supporting information

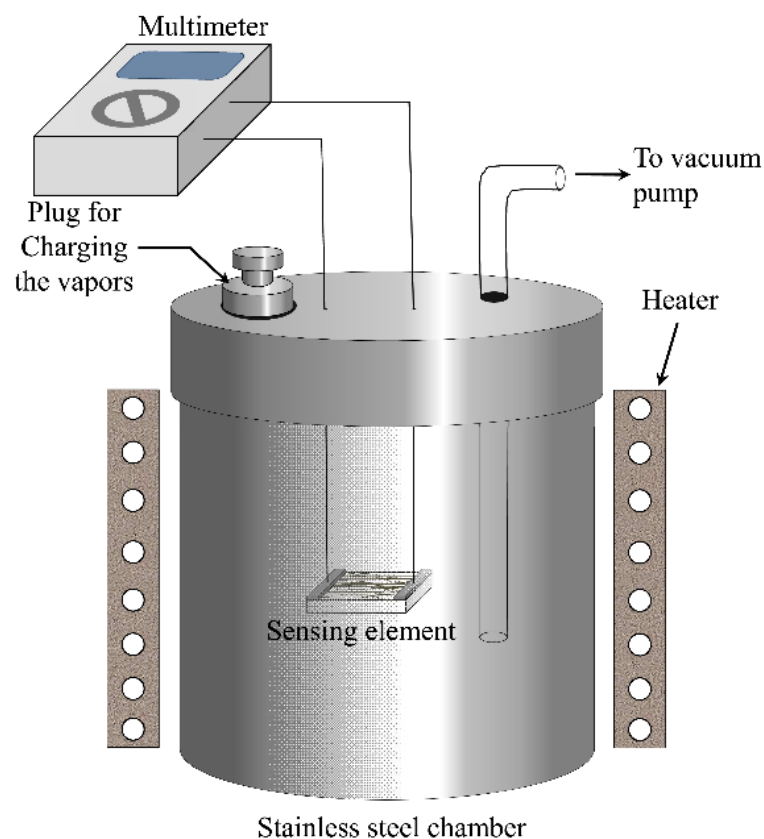

**Fig. S1** Schematic of the gas sensing unit

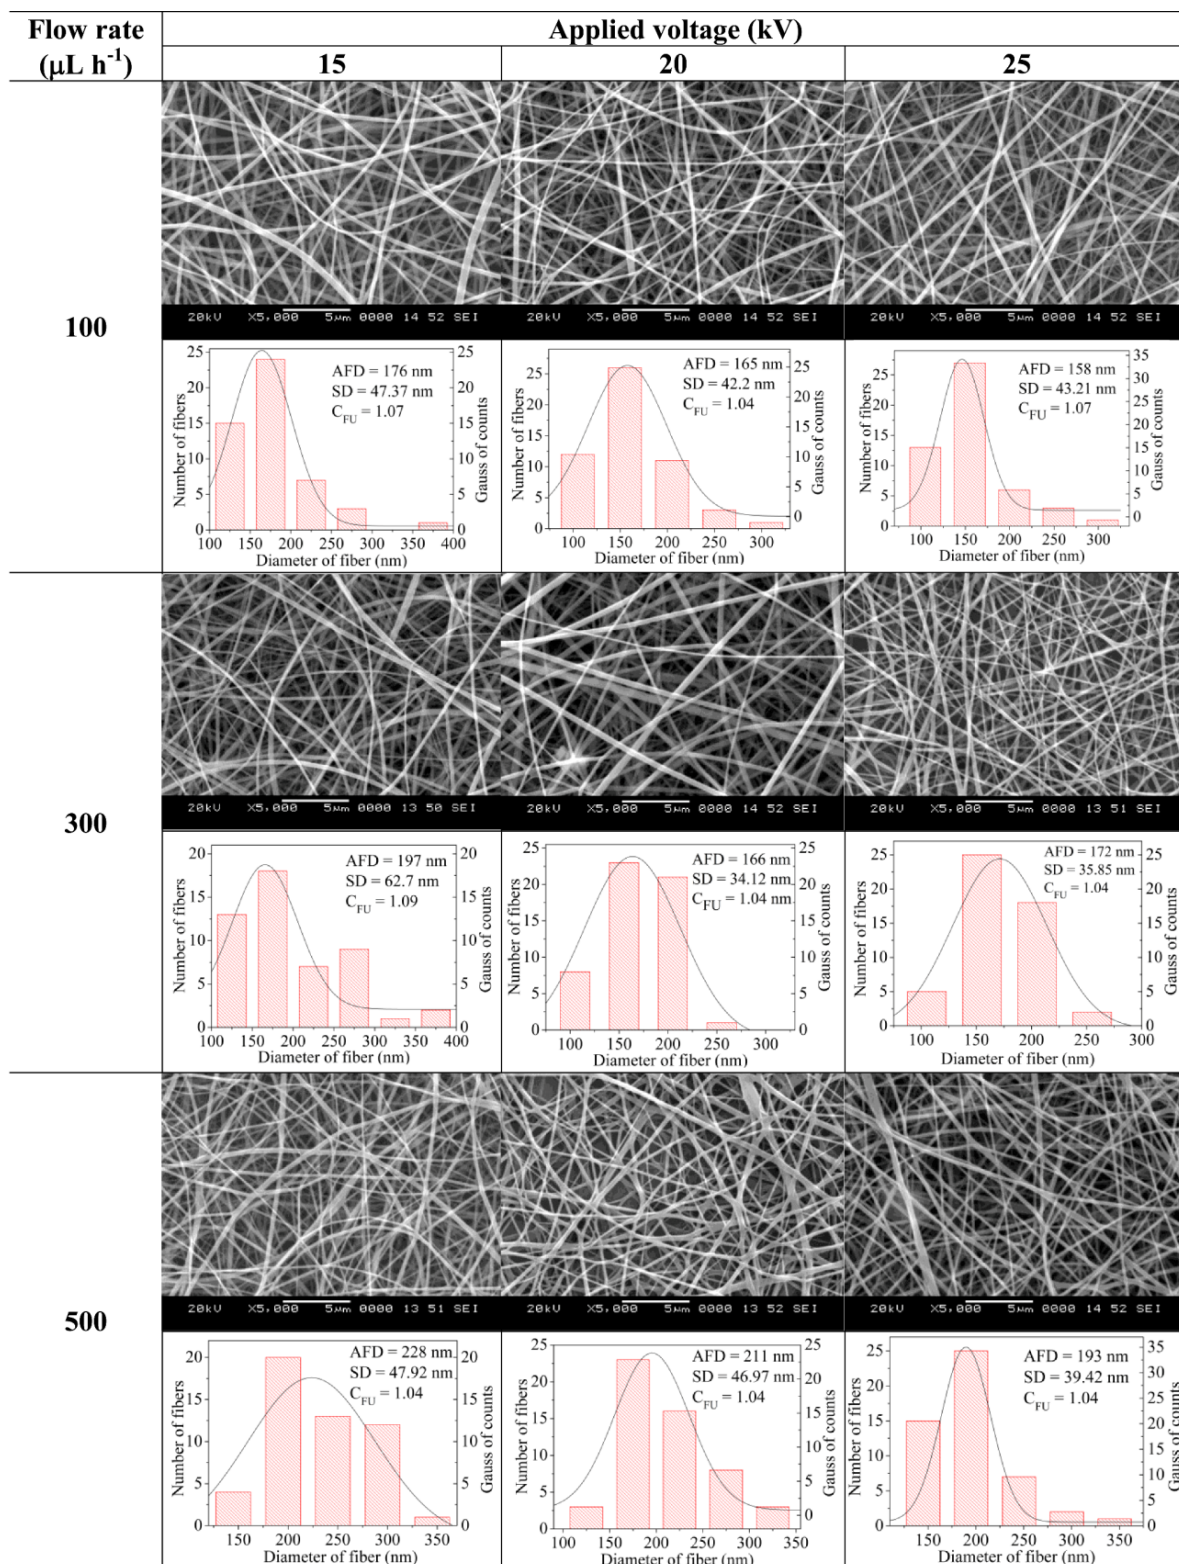

**Fig. S2** SEM micrographs and histograms (50 fibres) of electrospun PETox/NATH fibres at different applied voltages (15, 20 and 25 kV) and flow rates (100, 300 and 500  $\mu\text{L.h}^{-1}$ ). The insets in histogram represent average fibre diameter (AFD), fibre uniformity coefficient (CFU) and standard deviation in fibre diameter (SD).

## FTIR spectra of the precursor fibre mats

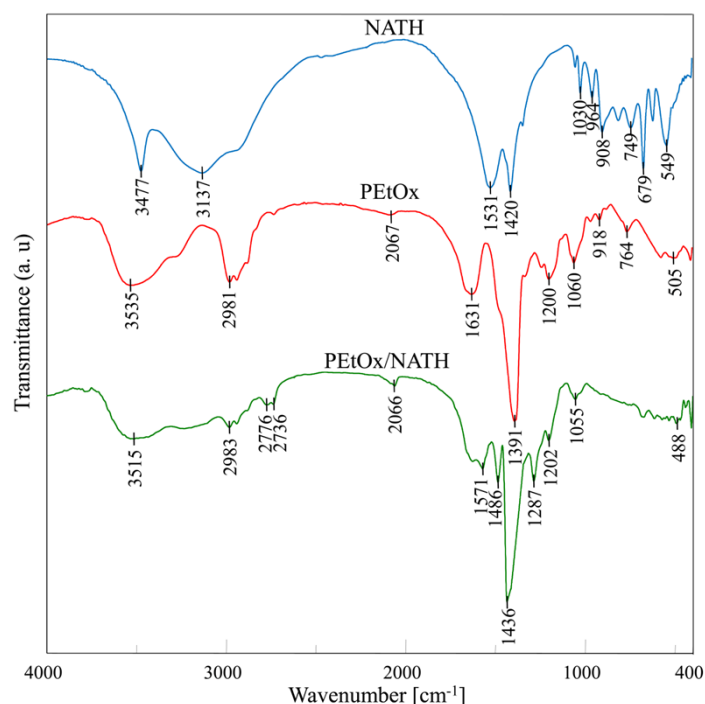

**Fig. S3** FTIR spectra of PEtOx, NATH and PEtOx/NATH composite fibres

In all spectra, the peaks  $>3400\text{ cm}^{-1}$  are due to OH stretching and the peaks at 2977 and at  $2935\text{ cm}^{-1}$  are attributed to the symmetric and asymmetric vibrations of  $\text{CH}_2$ , respectively. In the spectrum of NATH, the peaks at  $1531$  and  $1420\text{ cm}^{-1}$  are assigned to the C=O in ionized acetate and C-H deformation in the acetate, respectively. In the spectrum of PEtOx, the peak at  $2066\text{ cm}^{-1}$  is attributed to the C=O stretching, the peak at  $1633\text{ cm}^{-1}$  is assigned to NH bending, The peaks at  $1,391$  and  $1,060\text{ cm}^{-1}$  correspond to CH bending and C–O stretching, respectively, and the peak at  $1200\text{ cm}^{-1}$  is attributed to the C-N stretching.<sup>1</sup>

## TG analysis of NiO nanofibers

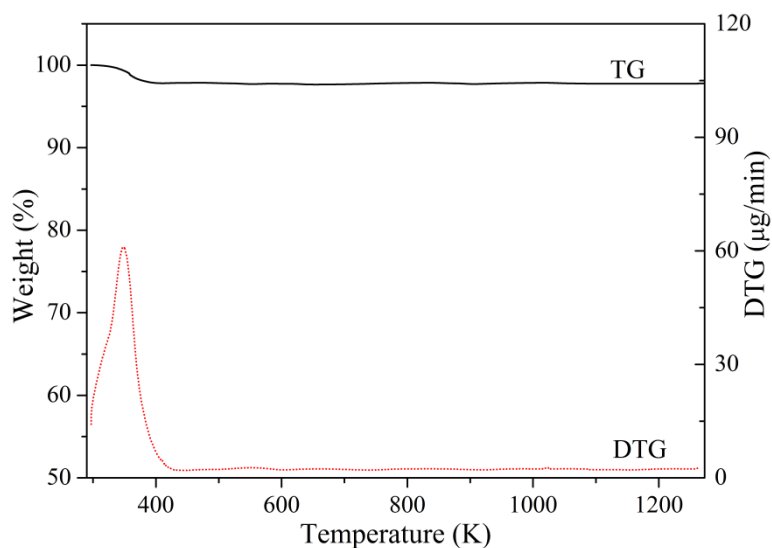

**Fig. S4** TG and DTG curves of NiO nanofibers obtained at  $673\text{ K}$ .

### Determination of Grain size from XRD pattern

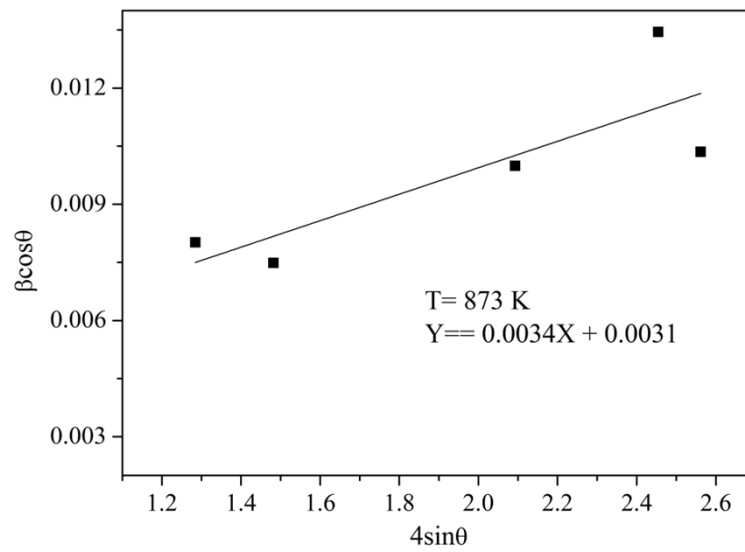

**Fig. S5** Williamson-Hall plot for determining crystallite size and lattice strain in NiO nanofibres obtained at 873 K.

Williamson-Hall equation,

$$\beta_{hkl} \cos \theta = \left( \frac{k\lambda}{D} \right) + 4\varepsilon \sin \theta \quad (7)$$

Where,  $\beta_{hkl}$  is the full width at half maximum of the XRD peaks,  $k$  is a constant and its value is 0.9,  $D$  is the grain size,  $\lambda$  is the wavelength of the x-rays used for the analysis,  $\varepsilon$  is the induced strain and  $\theta$  is the Bragg angle. The grain size was calculated from the 'y' intercept of the linear fit of the plot of  $\beta\cos\theta$  vs.  $4\sin\theta$  (**Fig. S5**).

### Grain growth

Arrhenius equation:

$$D = A \exp\left(\frac{-E_a}{RT}\right) \quad (8)$$

Where,  $D$  is the average grain size,  $A$  is the pre-exponential factor,  $E_a$  is the activation energy for atomic/ionic diffusion around the grain boundary,  $R$  is the gas constant, and  $T$  is temperature in Kelvin.<sup>2</sup>

Considering  $E_a$  as 10.94 kJ mol<sup>-1</sup> (ref. 3) and  $R$  as 8.314 J K<sup>-1</sup> mol<sup>-1</sup>, the value of  $A$  was calculated for the grain size corresponding to the calcination temperature of 673 K. The value of  $A$  is 136.37 nm K<sup>-1</sup>, which was used for the calculation of grain sizes of the fibres obtained

at other temperatures also and the results are presented in **Table 1**.

### XPS analysis

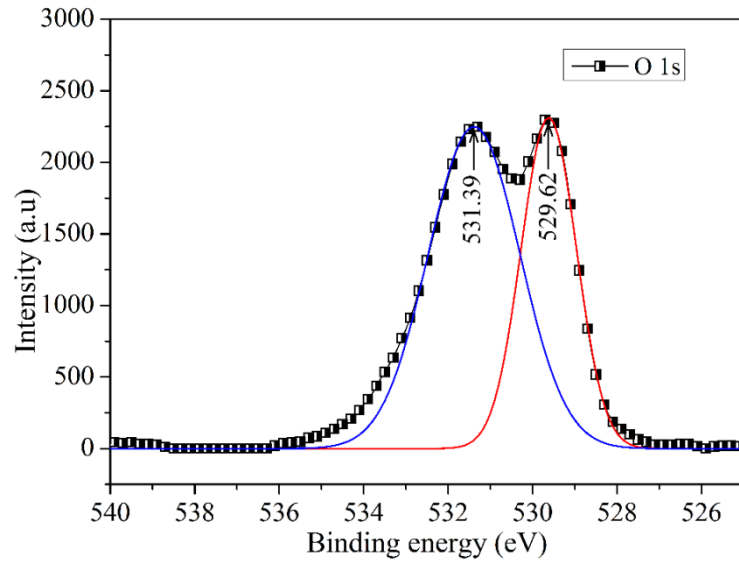

**Fig. S6** XP spectrum of oxygen (O-1s)

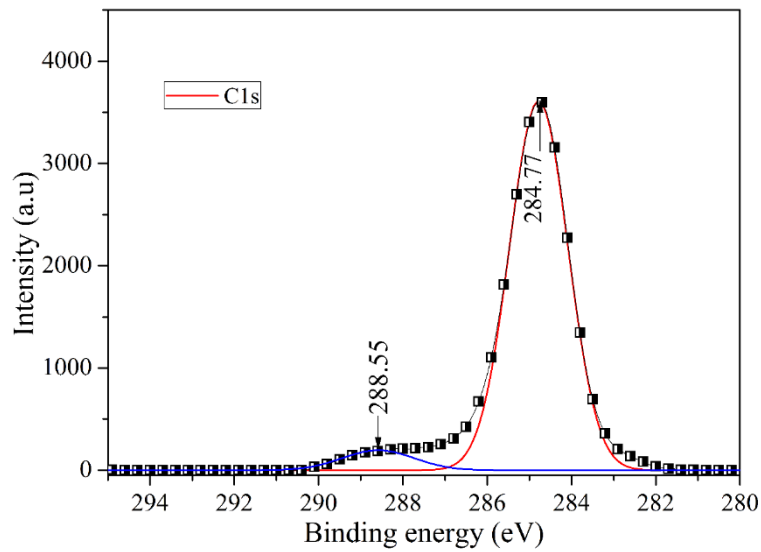

**Fig S7** XP spectrum of carbon (C-1s)

### Determination of band gap energy and Urbach energy

To determine the band gap energy from the optical spectra, the following relation is used;<sup>4</sup>

$$(\alpha h\nu)^2 \propto (h\nu - E_g) \quad (9)$$

Where,  $\alpha$  is the absorption coefficient,  $h\nu$  is the photon energy,  $E_g$  is the band gap, and  $n$  is either 1/2 for an indirect transition or 2 for a direct transition. The intercept of the linear region of the plot  $(\alpha h\nu)^2$  vs.  $h\nu$  (**Fig. 11b**) with x-axis determines the band gap energy.

Urbach energy is calculated by taking the inverse of the slope of the linear region in the plot of  $\ln(\alpha)$  vs.  $h\nu$  (**Fig. 11c**).<sup>5</sup> Urbach energy of the NiO nanofibres obtained at different calcination temperatures are shown in **Table 3**.

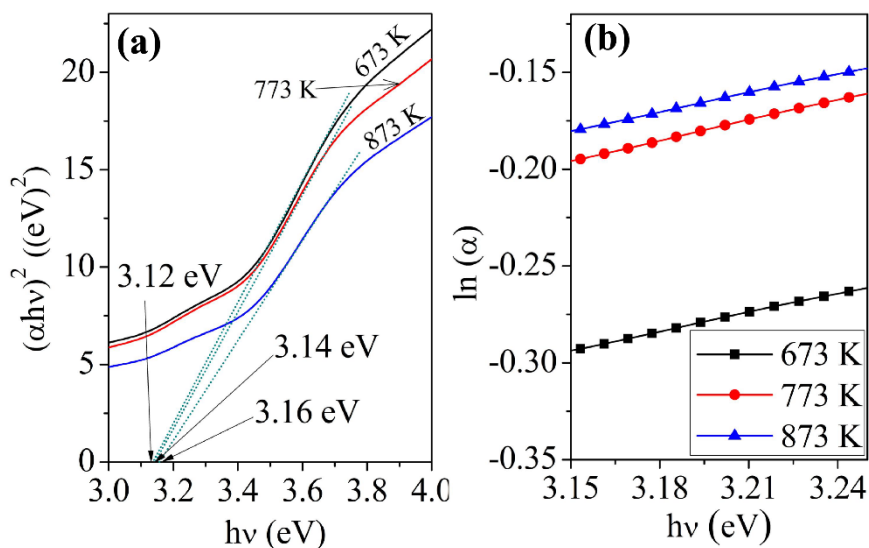

**Fig. S8** (a) Determination of band gap from UV spectra (c) Calculation of Urbach energy of NiO nanofibres.

## References

1. B.D. Mistry, *A Handbook of spectroscopic data: Chemistry - UV, IR, PMR, CNMR and mass spectroscopy*, Oxford Book Co., Jaipur, 2009.
2. T. Senthil and S. Anandhan, *J. Colloid Interface Sci.*, 2014, **432**, 285–296.
3. S.-W. Choi, J. Y. Park and S. S. Kim, *Mater. Chem. Phys.*, 2011, **127**, 16–20.
4. L. J. Pilione, K. Vedam, J. E. Yehoda, R. Messier and P. J. McMarr, *Phys. Rev. B*, 1987, **35**, 9368–9371.
5. B. Choudhury, M. Dey and A. Choudhury, *Int. Nano. Lett.*, 2013, **3**, 1–8.
